# Supplementary material
Source: Springer Nature journal article supplement (https://www.springermedizin.de/resource/supplementary/12872_2006_124_MOESM3_ESM.pdf/9431068)

Difference between Measurements (Same Observer)

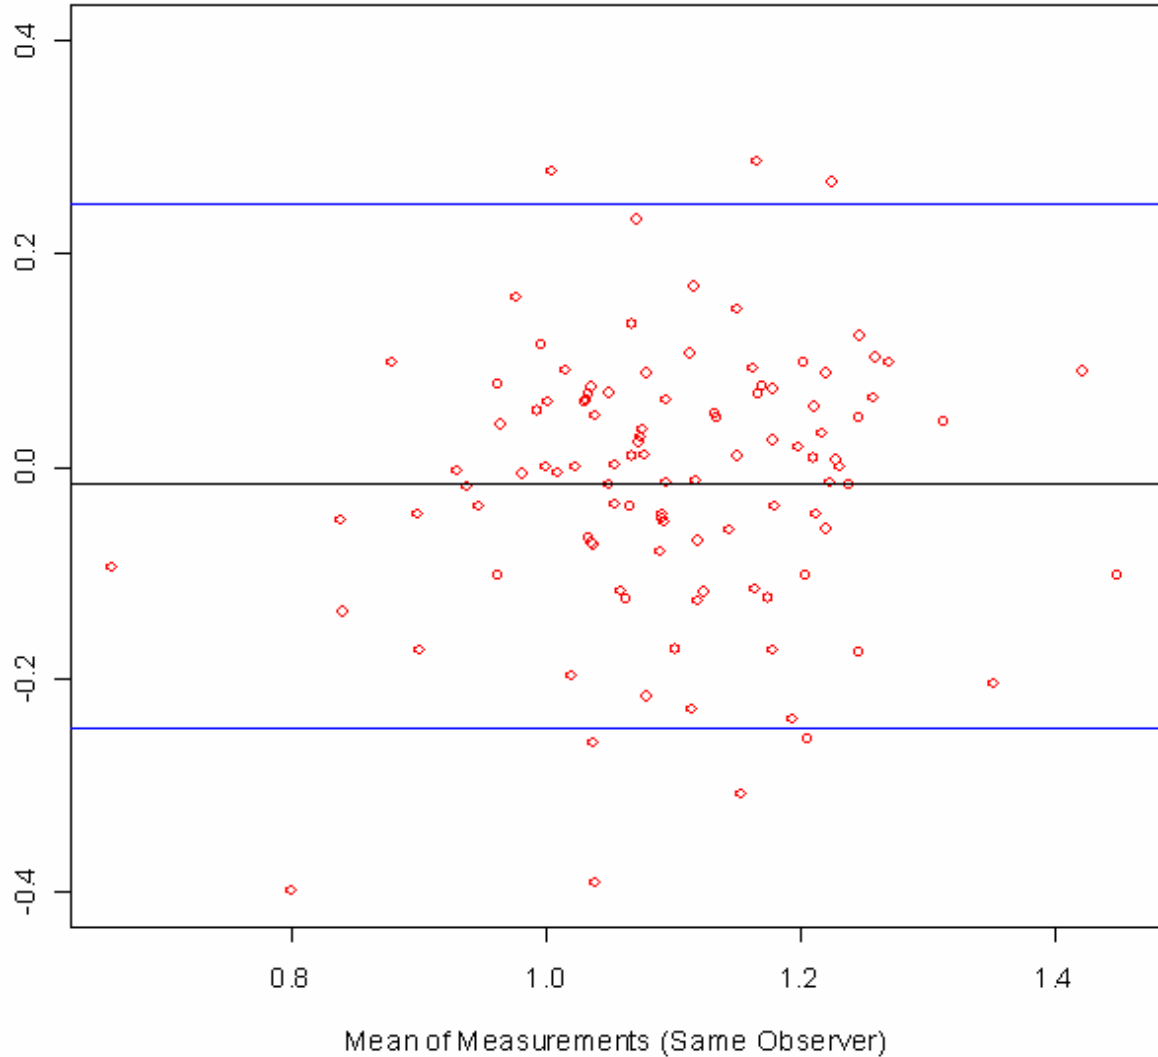

Supplement: MOESM3 [file 9431068]
